# Supplementary material
Source: HighWire-hosted journal article supplement (https://bmjopen.bmj.com/content/7/10/e018022)
Supplement: inline-supplementary-material-1 [file inline-supplementary-material-1.pdf]

## Appendix 1. MEDLINE search terms and strategy

---

| #  | Searches                                                                                                                                                                           |
|----|------------------------------------------------------------------------------------------------------------------------------------------------------------------------------------|
| 1  | exp Food Assistance/ and (aid or aide or assist* or bag* or bank* or box* or pantr* or shelf or shelves or secure or insecurity or insecure).ti,ab.                                |
| 2  | exp Food/ and (food adj1 (aid or aide or assist* or bag* or bank* or box* or pantr* or shelf or shelves or secure or insecurity or insecure)).ti.                                  |
| 3  | exp *Food Supply/ and (food adj2 (aid or aide or assistance* or bag* or bank* or box* or pantr* or shelf or shelves)).ti,ab.                                                       |
| 4  | exp Food Supply/ and (food adj2 (aid or aide or assistance* or bag* or bank* or box* or pantr* or shelf or shelves)).ti.                                                           |
| 5  | (food adj2 (aid or aide or assist* or bag* or bank* or box* or pantr* or shelf or shelves or secure or insecurity or insecure or scarcity)).ti.                                    |
| 6  | ((emergency adj2 (food* or meal* or nutrition)) not (disaster* or tornado* or fire* or mudslide* or flood* or poisoning or spoil*)).mp.                                            |
| 7  | ((charity or charitable) adj2 (food* or meal* or nutrition)) or (soup adj kitchen*) or ("free meal" or "free meals") or "food support").ti,ab.                                     |
| 8  | (community and ((food* or meal*) adj1 (aid or aide or assistance* or bag* or bank* or box* or pantr* or shelf or shelves or secure or insecurity or insecure or scarcity))).ti,ab. |
| 9  | exp Hunger/ and (food adj2 (aid or aide or assist* or bag* or bank* or box* or pantr* or shelf or shelves or secure or insecurity or insecure)).ti.                                |
| 10 | 1 or 2 or 3 or 4 or 5 or 6 or 7 or 8 or 9                                                                                                                                          |
| 11 | limit 10 to english language                                                                                                                                                       |
| 12 | limit 11 to yr="1997 - 2017"                                                                                                                                                       |

---
